# Supplementary material for: Genome-wide association analysis of chickpea germplasms differing for salinity tolerance based on DArTseq markers
Source: PLoS One. 2021 Dec 1;16(12):e0260709. doi: 10.1371/journal.pone.0260709 (PMC8635330; doi:10.1371/journal.pone.0260709)
Supplement: S1 Table — The chickpea subset was selected from ICARDA’s genebank using the FIGS strategy. (XLS) [file pone.0260709.s001.xls]

## Sheet: Sheet1
Genotype	Type	Country	Geo-coordinates
G115390	Dezi	Nepal	28.8333	80.3597
G117696	Dezi	Pakistan	32.1814	71.5072
G117697	Dezi	Pakistan	32.0814	71.4939
G117699	Dezi	Pakistan	31.9375	71.4567
G117700	Dezi	Pakistan	31.5919	71.0581
G117703	Dezi	Pakistan	29.6772	72.4414
G117714	Dezi	Pakistan	29.6889	72.6636
G117728	Dezi	Pakistan	29.4144	72.85
G125021	Dezi	Russian Federation	55.7577	76.0509
G128434	Dezi	Azerbaijan	38.7333	48.8333
G128506	Dezi	Azerbaijan	40.2233	47.13
G134564	Dezi	Pakistan
G69620	Dezi	India
G70340	Dezi	Pakistan	27.7667	68.8167
G70345	Dezi	Pakistan	27.8	69.1
G70346	Dezi	Pakistan	27.9667	69.2167
G70347	Dezi	Pakistan	28.0667	69.4667
G70348	Dezi	Pakistan	28.0667	69.7333
G70350	Dezi	Pakistan	28.1833	69.6833
G70351	Dezi	Pakistan	28.2167	69.9833
G70755	Dezi	Pakistan	24.6667	68.8333
G70760	Dezi	Pakistan	26.25	68.4333
G70770	Dezi	Pakistan	28.3667	70.3333
G74929	Dezi	Pakistan
G8985	Dezi	India	26.3	76.65
GHowzat	Dezi	australia
GKyabra	Dezi	australia
Gpbahattrick	Dezi	australia
Gpbapistol	Dezi	australia
G114795	Kabuli	Ethiopia	8.43185	39.3226
G115380	Kabuli	Nepal	28.6767	80.3703
G128430	Kabuli	Azerbaijan	38.7667	48.7833
G131983	Kabuli	Egypt	25.6833	32.6333
G134532	Kabuli	India
G6057	Kabuli	Pakistan
G6058	Kabuli	Pakistan	33.7667	72.4333
G6111	Kabuli	India
G6113	Kabuli	India
G6446	Kabuli	India
G69605	Kabuli	Tunisia	36.7167	9.18333
G70246	Kabuli	Pakistan	24.7333	67.5333
G70248	Kabuli	Pakistan	24.55	67.8667
G70249	Kabuli	Pakistan	24.5833	68.0833
G70252	Kabuli	Pakistan	24.8833	68.85
G70253	Kabuli	Pakistan	24.95	68.7333
G70255	Kabuli	Pakistan	25.4167	68.4167
G70270	Kabuli	Pakistan	26.0333	68.85
G70272	Kabuli	Pakistan	25.9167	68.6833
G70273	Kabuli	Pakistan	25.8833	68.5833
G70275	Kabuli	Pakistan	25.7333	68.4833
G70278	Kabuli	Pakistan	26	68.3
G70280	Kabuli	Pakistan	26.1333	68.2667
G70286	Kabuli	Pakistan	26.25	68.4167
G70290	Kabuli	Pakistan	26.3167	67.9333
G70291	Kabuli	Pakistan	26.5	67.9667
G70293	Kabuli	Pakistan	26.6	67.9333
G70294	Kabuli	Pakistan	26.6333	67.9667
G70305	Kabuli	Pakistan	26.4167	67.8333
G70308	Kabuli	Pakistan	26.6667	68.0167
G70309	Kabuli	Pakistan	27.0167	67.6667
G70311	Kabuli	Pakistan	27.0667	67.85
G70330	Kabuli	Pakistan	27.8167	68.4
G70332	Kabuli	Pakistan	27.8167	68.5
G70334	Kabuli	Pakistan	27.9	68.6333
G70336	Kabuli	Pakistan	28.25	68.4667
G70338	Kabuli	Pakistan	27.8167	68.6833
G70349	Kabuli	Pakistan	28.0833	69.65
G70352	Kabuli	Pakistan	28.4333	70.3167
G70355	Kabuli	Pakistan	28.6333	70.65
G70357	Kabuli	Pakistan	28.9333	70.7333
G70359	Kabuli	Pakistan	29.2	70.9833
G70361	Kabuli	Pakistan	29.6667	70.9
G70363	Kabuli	Pakistan	30.1833	71.4833
G70370	Kabuli	Pakistan	30.5333	71.55
G70377	Kabuli	Pakistan	31.45	71.3833
G70379	Kabuli	Pakistan	31.4167	71.3833
G70381	Kabuli	Pakistan	31.2667	71.4333
G70383	Kabuli	Pakistan	31.2167	71.4333
G70388	Kabuli	Pakistan	31.0333	71.4667
G70389	Kabuli	Pakistan	31.3833	71.6333
G70390	Kabuli	Pakistan	31.8833	71.9
G70393	Kabuli	Pakistan	31.3833	71.8333
G70394	Kabuli	Pakistan	31.5333	71.8167
G70401	Kabuli	Pakistan	31.6833	71.5167
G70402	Kabuli	Pakistan	31.7833	71.65
G70409	Kabuli	Pakistan	31.8	71.7333
G70410	Kabuli	Pakistan	31.8333	71.85
G70413	Kabuli	Pakistan	31.7667	71.9167
G70421	Kabuli	Pakistan	32.5833	71.5333
G70427	Kabuli	Pakistan	32.6833	71.7667
G70428	Kabuli	Pakistan	33.0667	72.4667
G70429	Kabuli	Pakistan	33.5333	72.5333
G70430	Kabuli	Pakistan	33.35	72.4667
G70434	Kabuli	Pakistan	32.9667	72.4167
G70761	Kabuli	Pakistan	26.6667	68
G70762	Kabuli	Pakistan	26.85	68.1833
G70764	Kabuli	Pakistan	27.9667	68.7
G70767	Kabuli	Pakistan	27.9167	68.5
G70768	Kabuli	Pakistan	27.5333	68.3
G70772	Kabuli	Pakistan	30.8167	73.5167
G70773	Kabuli	Pakistan	29.3667	72.8333
G70774	Kabuli	Pakistan	30.0667	71.25
G70775	Kabuli	Pakistan	31.2	71.2167
G70776	Kabuli	Pakistan	31.6667	71.1333
G70777	Kabuli	Pakistan	31.0667	72.9667
G70779	Kabuli	Pakistan	31.3333	73.4167
G70781	Kabuli	Pakistan	27.9667	68.7
G70782	Kabuli	Pakistan	32.3833	74.35
G70783	Kabuli	Pakistan	32.5833	74.1
G70784	Kabuli	Pakistan	32.6833	74.0167
G70785	Kabuli	Pakistan	32.9167	72.4833
G73369	Kabuli	India
G73382	Kabuli	India
G73386	Kabuli	India	24.5333	81.3
G74940	Kabuli	India	31.04	76.71
G75029	Kabuli	India	29.47	76.16
G75360	Kabuli	India
G75406	Kabuli	India	32.71	74.85
G7714	Kabuli	India
G7717	Kabuli	India
G7758	Kabuli	India
G8256	Kabuli	India
G8447	Kabuli	Sudan
G8914	Kabuli	Pakistan
G9088	Kabuli	India
G9239	Kabuli	Italy
G9425	Kabuli	Pakistan
G9430	Kabuli	India	31.4833	76.2667
G9431	Kabuli	India	31.4833	76.2667
G9434	Kabuli	India	30.06	75.53
G9435	Kabuli	India	30.24	75.84
G9436	Kabuli	India	30.2889	76.425
G9437	Kabuli	India	30.66	74.75
G9438	Kabuli	India	30.66	74.75
G9439	Kabuli	India	32.04	75.4
G9440	Kabuli	India	32.04	75.4
G9441	Kabuli	India	31.53	75.91
G9442	Kabuli	India	31.4833	76.2833
G9584	Kabuli	Nepal	27.1667	84.9833
G9627	Kabuli	India	31.45	75.91
G9629	Kabuli	India	31.4833	76.2667
G9630	Kabuli	India	31.3664	76.7339
G117698	Kabuli	Pakistan	32.0347	71.4833
G117708	Kabuli	Pakistan	29.6528	72.5767
G125018	Kabuli	Azerbaijan	38.75	48.8333
G125028	Kabuli	Russian Federation	55.7577	76.0509
G128465	Kabuli	Italy	41.8833	12.65
G131985	Kabuli	Egypt	25.7333	32.7
G132032	Kabuli	Syrian Arab Republic
G6041	Kabuli	Sudan
G6050	Kabuli	India	30.8167	75.1667
G6109	Kabuli	India
G6468	Kabuli	Tunisia
G70265	Kabuli	Pakistan	25.5333	69.0167
G70269	Kabuli	Pakistan	25.8333	69.4167
G70285	Kabuli	Pakistan	26.1833	68.4
G70297	Kabuli	Pakistan	26.6833	67.85
G70299	Dezi	Pakistan	26.7167	67.75
G70312	Dezi	Pakistan	27.15	68
G70313	Kabuli	Pakistan	27.3	68.05
G70328	Kabuli	Pakistan	27.6667	68.35
G70342	Kabuli	Pakistan	27.7	68.0667
G70369	Kabuli	Pakistan	30.6667	71.3
G70371	Kabuli	Pakistan	30.5667	71.2333
G70375	Kabuli	Pakistan	31.35	71.2167
G70384	Kabuli	Pakistan	31.1167	71.4667
G70398	Kabuli	Pakistan	31.6333	71.7
G70399	Kabuli	Pakistan	31.6333	71.5167
G70408	Kabuli	Pakistan	31.5	71.4833
G70419	Kabuli	Pakistan	32.0167	71.8333
G70432	Kabuli	Pakistan	33.1667	72.4667
G70556	Kabuli	Russian Federation	55.7577	76.0509
G70780	Dezi	Pakistan	31.45	74.1
G70789	Kabuli	Pakistan	25.3167	70.2167
G70822	Kabuli	Pakistan
G71832	Kabuli	Turkey
G73388	Kabuli	Turkey	36.35	35.9167
G73390	Kabuli	Turkey	36.3667	36.2667
G73394	Kabuli	Turkey	36.1	35.95
G74021	Kabuli	India
G74979	Dezi	Nepal	28.56	80.78
G74994	Dezi	India	28.65	77.2333
G74995	Kabuli	India	32.71	74.85
G7722	Kabuli	India
G9244	Kabuli	Italy
G9413	Kabuli	India

## Sheet: Sheet2
6041	NA	6041	Kabuli	1
6050	NA	6050	Kabuli	1
6109	NA	6109	Kabuli	1
6468	NA	6468	Kabuli	1
7722	NA	7722	Kabuli	1
9244	NA	9244	Kabuli	1
9413	NA	9413	Kabuli	1
70265	NA	70265	Kabuli	1
70269	NA	70269	Kabuli	1
70285	NA	70285	Kabuli	1
70297	NA	70297	Kabuli	1
70299	NA	70299	Kabuli	1
70312	NA	70312	Kabuli	1
70313	NA	70313	Kabuli	1
70328	NA	70328	Kabuli	1
70342	NA	70342	Dezi	1
70369	NA	70369	Dezi	1
70371	NA	70371	Kabuli	1
70375	NA	70375	Kabuli	1
70384	NA	70384	Kabuli	1
70398	NA	70398	Kabuli	1
70399	NA	70399	Kabuli	1
70408	NA	70408	Kabuli	1
70419	NA	70419	Kabuli	1
70432	NA	70432	Kabuli	1
70556	NA	70556	Kabuli	1
70780	NA	70780	Kabuli	1
70789	NA	70789	Kabuli	1
70822	NA	70822	Kabuli	1
71832	NA	71832	Kabuli	1
73388	NA	73388	Dezi	1
73390	NA	73390	Kabuli	1
73394	NA	73394	Kabuli	1
74021	NA	74021	Kabuli	1
74979	NA	74979	Kabuli	1
74994	NA	74994	Kabuli	1
74995	NA	74995	Kabuli	1
117698	NA	117698	Kabuli	1
117708	NA	117708	Dezi	1
125018	NA	125018	Dezi	1
125028	NA	125028	Kabuli	1
128465	NA	128465	Kabuli	1
131985	NA	131985	Kabuli	1
132032	NA	132032	Kabuli	1
		Howzat	Dezi
		Kyabra	Dezi
		pbahattrick	Dezi
		pbapistol	Dezi

## Sheet: Sheet3
IG	Type
6041	Kabuli
6050	Kabuli
6109	Kabuli
6468	Kabuli
7722	Kabuli
9244	Kabuli
9413	Kabuli
70265	Kabuli
70269	Kabuli
70285	Kabuli
70297	Kabuli
70299	Kabuli
70312	Kabuli
70313	Kabuli
70328	Kabuli
70342	Dezi
70369	Dezi
70371	Kabuli
70375	Kabuli
70384	Kabuli
70398	Kabuli
70399	Kabuli
70408	Kabuli
70419	Kabuli
70432	Kabuli
70556	Kabuli
70780	Kabuli
70789	Kabuli
70822	Kabuli
71832	Kabuli
73388	Dezi
73390	Kabuli
73394	Kabuli
74021	Kabuli
74979	Kabuli
74994	Kabuli
74995	Kabuli
117698	Kabuli
117708	Dezi
125018	Dezi
125028	Kabuli
128465	Kabuli
131985	Kabuli
132032	Kabuli
Howzat	Dezi
Kyabra	Dezi
pbahattrick	Dezi
pbapistol	Dezi
